# Supplementary material for: Comparison of Fractionated Versus Bolus Administration of Different Doses of Hyperbaric Bupivacaine Combined With Opioids in Spinal Anesthesia for Caesarean Section – A Prospective, Randomized, Single Blind Clinical Trial
Source: Research Square preprint supplement (doi:10.21203/rs.3.rs-7847370/v1), 2025-12-16
Supplement: Supplementary file 1 [file 4485f566731d9df1cdda243c.pdf]

## CONSORT 2025 Flow Diagram

Flow diagram of the progress through the phases of a randomised trial (that is, enrolment, intervention allocation, and data analysis) of three groups (B, F7 and F6)

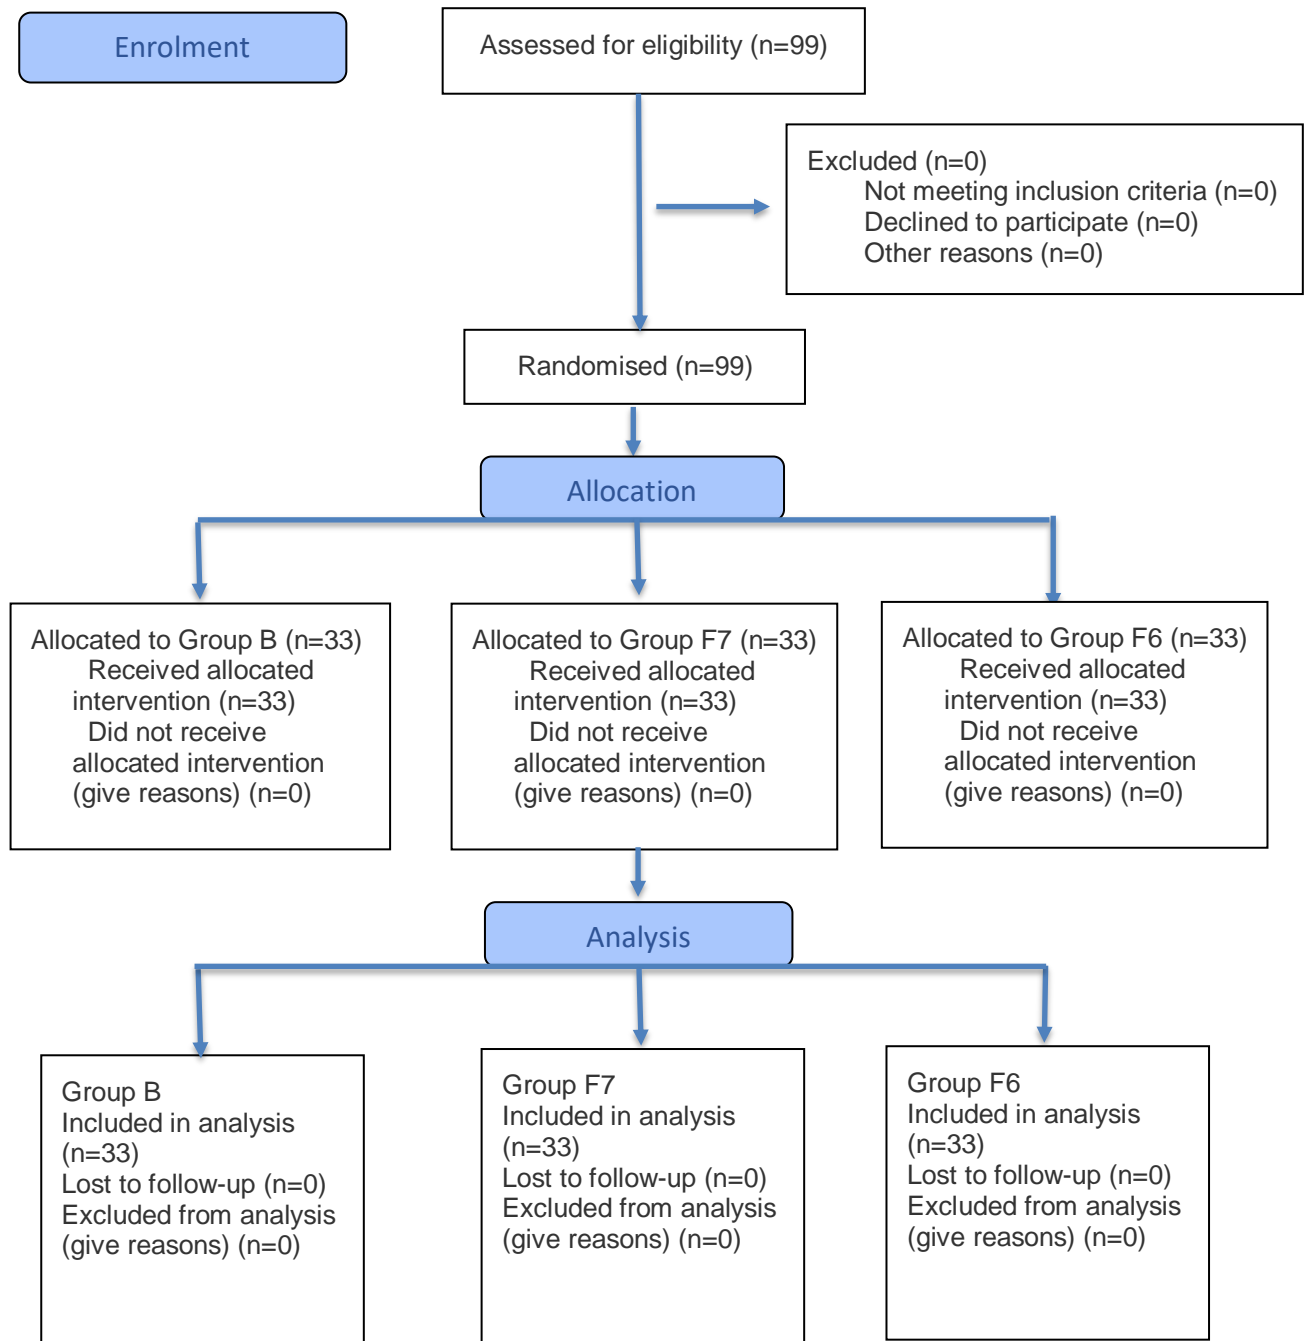

Citation: Hopewell S, Chan AW, Collins GS, Hróbjartsson A, Moher D, Schulz KF, et al. CONSORT 2025 Statement: updated guideline for reporting randomised trials. *BMJ*. 2025; 388:e081123.

<https://dx.doi.org/10.1136/bmj-2024-081123>

© 2025 Hopewell et al. This is an Open Access article distributed under the terms of the Creative Commons Attribution License (<https://creativecommons.org/licenses/by/4.0/>), which permits unrestricted use, distribution, and reproduction in any medium, provided the original work is properly cited.
